# Supplementary material for: Measuring changes in transmission of neglected tropical diseases, malaria, and enteric pathogens from quantitative antibody levels
Source: PLOS journal article supplement (doi:10.1371/journal.pntd.0005616), 2017-05-19
Supplement: S3 (10.1371/journal.pntd.0005616.s003) [file journal.pntd.0005616.s003]

## Measuring changes in transmission of neglected tropical diseases, malaria, and enteric pathogens from quantitative antibody levels

S1 Table. Strengthening the Reporting of Observational Studies in Epidemiology (STROBE) Checklist

| Item                      | DESCRIPTION                                                                                                                     | REPORTED IN SECTION                                                                                                                                                                        |
|---------------------------|---------------------------------------------------------------------------------------------------------------------------------|--------------------------------------------------------------------------------------------------------------------------------------------------------------------------------------------|
| <b>Title and Abstract</b> |                                                                                                                                 |                                                                                                                                                                                            |
| 1a                        | Indicate the study's design with a commonly used term in the title or the abstract                                              | Abstract (repeated cross-sectional surveys)                                                                                                                                                |
| 1b                        | Provide in the abstract an informative and balanced summary of what was done and what was found                                 | Abstract                                                                                                                                                                                   |
| <b>Introduction</b>       |                                                                                                                                 |                                                                                                                                                                                            |
| Background/rationale      |                                                                                                                                 |                                                                                                                                                                                            |
| 2                         | Explain the scientific background and rationale for the investigation being reported                                            | Introduction                                                                                                                                                                               |
| Objectives                |                                                                                                                                 |                                                                                                                                                                                            |
| 3                         | State specific objectives, including any prespecified hypotheses                                                                | Introduction                                                                                                                                                                               |
| <b>Methods</b>            |                                                                                                                                 |                                                                                                                                                                                            |
| Study Design              |                                                                                                                                 |                                                                                                                                                                                            |
| 4                         | Present key elements of study design early in the paper                                                                         | Methods -<br>- Overview of the approach                                                                                                                                                    |
| Setting                   |                                                                                                                                 |                                                                                                                                                                                            |
| 5                         | Describe the setting, locations, and relevant dates, including periods of recruitment, exposure, follow-up, and data collection | Methods -<br>- Lymphatic filariasis transmission on Mauke Island<br>- Malaria transmission in the Garki Project, Nigeria<br>- Enteric pathogen transmission in Haiti and the United States |
| Participants              |                                                                                                                                 |                                                                                                                                                                                            |
| 6a                        | Give the eligibility criteria, and the sources and methods of selection of participants. Describe methods of follow-up          | Methods -<br>- Lymphatic filariasis transmission on Mauke Island<br>- Malaria transmission in the Garki Project, Nigeria<br>- Enteric pathogen transmission in Haiti and the United States |
| 6b                        | For matched studies, give matching criteria and number of exposed and unexposed.                                                | NA                                                                                                                                                                                         |

|                             |                                                                                                                                                                                               |                                                                                                                                                                                            |
|-----------------------------|-----------------------------------------------------------------------------------------------------------------------------------------------------------------------------------------------|--------------------------------------------------------------------------------------------------------------------------------------------------------------------------------------------|
| Variables                   |                                                                                                                                                                                               |                                                                                                                                                                                            |
| 7                           | Clearly define all outcomes, exposures, predictors, potential confounders, and effect modifiers. Give diagnostic criteria, if applicable                                                      | Methods -<br>- Lymphatic filariasis transmission on Mauke Island<br>- Malaria transmission in the Garki Project, Nigeria<br>- Enteric pathogen transmission in Haiti and the United States |
| Data Sources and Management |                                                                                                                                                                                               |                                                                                                                                                                                            |
| 8                           | For each variable of interest, give sources of data and details of methods of assessment (measurement). Describe comparability of assessment methods if there is more than one group          | Methods -<br>- Lymphatic filariasis transmission on Mauke Island<br>- Malaria transmission in the Garki Project, Nigeria<br>- Enteric pathogen transmission in Haiti and the United States |
| Bias                        |                                                                                                                                                                                               |                                                                                                                                                                                            |
| 9                           | Describe any efforts to address potential sources of bias                                                                                                                                     | Methods<br>- Statistical methods                                                                                                                                                           |
| Study Size                  |                                                                                                                                                                                               |                                                                                                                                                                                            |
| 10                          | Explain how the study size was arrived at                                                                                                                                                     | NA                                                                                                                                                                                         |
| Quantitative Variables      |                                                                                                                                                                                               |                                                                                                                                                                                            |
| 11                          | Explain how quantitative variables were handled in the analyses. If applicable, describe which groupings were chosen and why                                                                  | Methods<br>- Statistical methods                                                                                                                                                           |
| Statistical Methods         |                                                                                                                                                                                               |                                                                                                                                                                                            |
| 12a                         | Describe all statistical methods, including those used to control for confounding                                                                                                             | Methods<br>- Statistical methods<br>- S1 Text<br>- S2 Text                                                                                                                                 |
| 12b                         | Describe any methods used to examine subgroups and interactions                                                                                                                               | NA                                                                                                                                                                                         |
| 12c                         | Explain how missing data were addressed                                                                                                                                                       | NA                                                                                                                                                                                         |
| 12d                         | If applicable, explain how loss to follow-up was addressed                                                                                                                                    | NA                                                                                                                                                                                         |
| 12e                         | Describe any sensitivity analyses                                                                                                                                                             | None                                                                                                                                                                                       |
| <b>Results</b>              |                                                                                                                                                                                               |                                                                                                                                                                                            |
| Participants                |                                                                                                                                                                                               |                                                                                                                                                                                            |
| 13a                         | Report numbers of individuals at each stage of study—eg numbers potentially eligible, examined for eligibility, confirmed eligible, included in the study, completing follow-up, and analysed | Results -<br>- Lymphatic filariasis in Mauke                                                                                                                                               |

|                   |                                                                                                                                                                                                          |                                                                                                                                                                                                |
|-------------------|----------------------------------------------------------------------------------------------------------------------------------------------------------------------------------------------------------|------------------------------------------------------------------------------------------------------------------------------------------------------------------------------------------------|
|                   |                                                                                                                                                                                                          | <ul style="list-style-type: none"> <li>- Malaria in the Garki Project, Nigeria</li> <li>- Enteric pathogens in Haiti and the USA</li> </ul>                                                    |
| 13b               | Give reasons for non-participation at each stage                                                                                                                                                         | NA                                                                                                                                                                                             |
| 13c               | Consider use of a flow diagram                                                                                                                                                                           | NA                                                                                                                                                                                             |
| Descriptive data  |                                                                                                                                                                                                          |                                                                                                                                                                                                |
| 14a               | Give characteristics of study participants (eg demographic, clinical, social) and information on exposures and potential confounders                                                                     | Results - <ul style="list-style-type: none"> <li>- Lymphatic filariasis in Mauke</li> <li>- Malaria in the Garki Project, Nigeria</li> <li>- Enteric pathogens in Haiti and the USA</li> </ul> |
| 14b               | Indicate number of participants with missing data for each variable of interest                                                                                                                          | NA                                                                                                                                                                                             |
| 14c               | Summarise follow-up time (eg, average and total amount)                                                                                                                                                  | NA                                                                                                                                                                                             |
| Outcome Data      |                                                                                                                                                                                                          |                                                                                                                                                                                                |
| 15                | Report numbers of outcome events or summary measures over time                                                                                                                                           | Fig 1, 2, 3, 4, 5                                                                                                                                                                              |
| Main Results      |                                                                                                                                                                                                          |                                                                                                                                                                                                |
| 16a               | Give unadjusted estimates and, if applicable, confounder-adjusted estimates and their precision (eg, 95% confidence interval). Make clear which confounders were adjusted for and why they were included | Fig 1, 2, 4, 5                                                                                                                                                                                 |
| 16b               | Report category boundaries when continuous variables were categorized                                                                                                                                    | Methods <ul style="list-style-type: none"> <li>- Statistical methods</li> </ul> S1 Fig<br>S3 Fig                                                                                               |
| 16c               | If relevant, consider translating estimates of relative risk into absolute risk for a meaningful time period                                                                                             | NA                                                                                                                                                                                             |
| Other Analyses    |                                                                                                                                                                                                          |                                                                                                                                                                                                |
| 17                | Report other analyses done—eg analyses of subgroups and interactions, and sensitivity analyses                                                                                                           | S1, S2, S3, S4 Fig                                                                                                                                                                             |
| <b>Discussion</b> |                                                                                                                                                                                                          |                                                                                                                                                                                                |
| Key Results       |                                                                                                                                                                                                          |                                                                                                                                                                                                |
| 18                | Summarise key results with reference to study objectives                                                                                                                                                 | Discussion                                                                                                                                                                                     |
| Limitations       |                                                                                                                                                                                                          |                                                                                                                                                                                                |

|                          |                                                                                                                                                                            |                                              |
|--------------------------|----------------------------------------------------------------------------------------------------------------------------------------------------------------------------|----------------------------------------------|
| 19                       | Discuss limitations of the study, taking into account sources of potential bias or imprecision. Discuss both direction and magnitude of any potential bias                 | Discussion -<br>- Limitations and next steps |
| Interpretation           |                                                                                                                                                                            |                                              |
| 20                       | Give a cautious overall interpretation of results considering objectives, limitations, multiplicity of analyses, results from similar studies, and other relevant evidence | Discussion -<br>- Interpretation             |
| Generalisability         |                                                                                                                                                                            |                                              |
| 21                       | Discuss the generalisability (external validity) of the study results                                                                                                      | Discussion -<br>- Limitations and next steps |
| <b>Other Information</b> |                                                                                                                                                                            |                                              |
| Funding                  |                                                                                                                                                                            |                                              |
| 22                       | Give the source of funding and the role of the funders for the present study and, if applicable, for the original study on which the present article is based              | Financial Disclosure                         |
